# Supplementary material for: An enzyme-free colorimetric assay using hybridization chain reaction amplification and split aptamers
Source: Royal Society of Chemistry journal article supplement (doi:10.1039/c5an01592h), 2015-01-01
Supplement: c5an01592h1.pdf [file c5an01592h1.pdf]

## Electronic Supplementary Information

### Enzyme-free colorimetric assay using hybridization chain reaction amplification and split aptamer

Qing Wang, Xiaohan Yang, Xiaohai Yang\*, Kemin Wang\*, Hua Zhang and Pei Liu

*State Key Laboratory of Chemo/Biosensing and Chemometrics, College of Chemistry and Chemical Engineering,*

*Key Laboratory for Bio-Nanotechnology and Molecular Engineering of Hunan Province, Hunan University,*

*Changsha 410082, China.*

*E-mail: kmwang@hnu.edu.cn; Tex/Fax: +86 731 88821566.*

**Table S1** Detection performance comparison of our strategy with other methods

| <b>Target</b>    | <b>Modified/unmodified AuNPs based colorimetric</b> | <b>Detection limits</b>      | <b>Reference</b> |
|------------------|-----------------------------------------------------|------------------------------|------------------|
| Hg <sup>2+</sup> | modified AuNPs                                      | 100 nM                       | 19               |
|                  | modified AuNPs                                      | 200 fM                       | 21               |
|                  | unmodified AuNPs                                    | 50 nM                        | 22               |
|                  | unmodified AuNPs                                    | 50 $\mu$ M                   | 23               |
|                  | unmodified AuNPs                                    | 0.5 $\mu$ M                  | 24               |
|                  | unmodified AuNPs                                    | 250 nM                       | 25               |
|                  | unmodified AuNPs                                    | 10 nM                        | 26               |
|                  | unmodified AuNPs                                    | 15 nM                        | this work        |
| adenosine        | modified AuNPs                                      | 0.3 mM                       | 27               |
|                  | modified AuNPs                                      | 10 $\mu$ M                   | 28               |
|                  | modified AuNPs                                      | 50 $\mu$ M                   | 29               |
|                  | modified AuNPs                                      | 1 mM                         | 30               |
|                  | modified AuNPs                                      | 0.25 mM                      | 31               |
|                  | modified AuNPs                                      | 6 nM                         | 32               |
|                  | unmodified AuNPs                                    | 500 ng/ml<br>(~1.88 $\mu$ M) | 33               |
|                  | unmodified AuNPs                                    | 1 $\mu$ M                    | this work        |
